# Supplementary material
Source: HighWire-hosted journal article supplement (http://ajnr-stage2.highwire.org/highwire/filestream/182789/field_highwire_adjunct_files/0/19-00547.pdf)
Supplement: 19-00547.pdf [file 19-00547.pdf]

On-line Table 1: Individual patient characteristics

| Patient No | Age (yr) | Sex | Presenting Symptoms    | Location <sup>a</sup> | Size (mm) | Treatment Method | Coil Density (%) | Time Interval <sup>b</sup> | Initial Angiography |
|------------|----------|-----|------------------------|-----------------------|-----------|------------------|------------------|----------------------------|---------------------|
| POR1       | 50s      | M   | Incidental             | Rt C6                 | 19.63     | PED              | —                | 15 days                    | OG3                 |
| POR2       | 70s      | F   | Incidental             | Lt C6                 | 23.15     | PED              | —                | 1 day                      | OG3                 |
| POR3       | 20s      | M   | Headache, diplopia     | Rt C4                 | 27.52     | PED              | —                | 1 day                      | OG3                 |
| POR4       | 50s      | F   | Headache               | Lt C4                 | 25.69     | PED + coil       | 4.92             | 1 day                      | OG3                 |
| POR5       | 40s      | F   | Headache               | Rt C6                 | 15.62     | PED + coil       | 8.92             | 1 day                      | OG1                 |
| POR6       | 40s      | M   | Olfactory abnormality  | Lt C7                 | 26.15     | PED + coil       | 2.41             | 1 day                      | OG3                 |
| POR7       | 50s      | F   | Incidental             | Rt C6                 | 21.97     | PED + coil       | 3.12             | 3 days                     | OG3                 |
| POR8       | 60s      | F   | Decreased vision       | Lt C6                 | 17.20     | PED + coil       | 5.91             | 120 days                   | OG2                 |
| POR9       | 40s      | F   | Incidental             | Lt C6                 | 19.68     | PED + coil       | 2.11             | 1 day                      | OG3                 |
| POR10      | 50s      | F   | Incidental             | Rt C6                 | 18.02     | PED + coil       | 3.35             | 1 day                      | OG2                 |
| POU1       | 50s      | F   | Decreased vision       | Rt C6                 | 17.95     | PED              | —                | 6 mo                       | OG3                 |
| POU2       | 10s      | M   | Incidental             | Lt C4                 | 19.01     | PED              | —                | 6 mo                       | OG3                 |
| POU3       | 50s      | F   | Decreased vision       | Rt C6                 | 23.12     | PED              | —                | 7 mo                       | OG3                 |
| POU4       | 50s      | M   | Dizziness and headache | Lt C6                 | 11.33     | PED              | —                | 7 mo                       | OG3                 |
| POU5       | 60s      | F   | Incidental             | Lt C6                 | 19.72     | PED              | —                | 7 mo                       | OG3                 |
| POU6       | 40s      | F   | Dizziness and headache | Lt C4                 | 13.16     | PED              | —                | 6 mo                       | OG3                 |
| POU7       | 40s      | F   | Dizziness and headache | Rt C5                 | 13.12     | PED + coil       | 5.91             | 6 mo                       | OG3                 |
| POU8       | 70s      | M   | Incidental             | Lt C6                 | 36.94     | PED + coil       | 3.64             | 6 mo                       | OG3                 |
| POU9       | 60s      | F   | Incidental             | Rt C4                 | 17.53     | PED + coil       | 2.08             | 4 mo                       | OG3                 |
| POU10      | 40s      | F   | Headache               | Rt C7                 | 15.72     | PED + coil       | 3.67             | 4 mo                       | OG2                 |
| POU11      | 40s      | F   | Incidental             | Lt C4                 | 11.66     | PED + coil       | 6.03             | 6 mo                       | OG2                 |
| POU12      | 60s      | F   | Dizziness              | Rt C6                 | 23.28     | PED + coil       | 2.43             | 10 mo                      | OG3                 |
| POU13      | 70s      | F   | Blurred vision         | Rt C6                 | 18.46     | PED + coil       | 10.15            | 6 mo                       | OG1                 |
| POU14      | 40s      | M   | Incidental             | Lt C6                 | 27.38     | PED + coil       | 4.16             | 10 mo                      | OG3                 |
| POU15      | 40s      | F   | Blurred vision         | Rt C6                 | 24.16     | PED + coil       | 5.70             | 4 mo                       | OG3                 |
| POU16      | 50s      | F   | Incidental             | Lt C6                 | 13.82     | PED + coil       | 3.62             | 4 mo                       | OG2                 |
| POU17      | 70s      | F   | Headache               | Lt C6                 | 17.15     | PED + coil       | 2.11             | 4 mo                       | OG3                 |
| POU18      | 50s      | F   | Incidental             | Lt C5                 | 19.42     | PED + coil       | 2.93             | 6 mo                       | OG3                 |
| POU19      | 50s      | F   | Decreased vision       | Lt C6                 | 18.21     | PED + coil       | 3.85             | 6 mo                       | OG3                 |
| POU20      | 60s      | F   | Blurred vision         | Rt C6                 | 17.39     | PED + coil       | 4.36             | 10 mo                      | OG3                 |

**Note:**— indicates without coils; POR, post-operative ruptured case; POU, post-operative unruptured case; F, female; M, male; Lt, left; Rt, right.

<sup>a</sup> The Bouthillier classification of internal carotid artery segments: C4 indicates cavernous; C5, clinoid; C6, ophthalmic; C7, communicating.

<sup>b</sup> The time interval for delayed-rupture cases indicates the time between angiography and eventual rupture. For unruptured cases, the time interval indicates the monitoring period from diagnosis.

On-line Table 2: Comparison of baseline characteristics between POR and POU groups<sup>a</sup>

|                                | POR Group (n = 10) | POU Group (n = 20) | P Value |
|--------------------------------|--------------------|--------------------|---------|
| Age (yr)                       | 50.50 ± 13.91      | 54.70 ± 13.37      | .441    |
| Female sex (No.) (%)           | 7 (70.0)           | 16 (80.0)          | .542    |
| Hypertension (No.) (%)         | 3 (30.0)           | 7 (35.0)           | .784    |
| Cigarette smoking (No.) (%)    | 2 (20.0)           | 4 (20.0)           | 1.000   |
| Symptomatic aneurysm (No.) (%) | 5 (50.0)           | 12 (60.0)          | .602    |
| Aneurysm size (mm)             | 21.46 ± 4.09       | 18.89 ± 6.01       | .113    |
| Aneurysm height (mm)           | 17.38 ± 4.01       | 17.47 ± 6.73       | .982    |
| Aneurysm neck (mm)             | 10.73 ± 3.85       | 11.48 ± 5.23       | .895    |
| Aspect ratio                   | 1.80 ± 0.70        | 1.72 ± 0.89        | .567    |
| Size ratio                     | 5.51 ± 1.50        | 5.51 ± 2.06        | .843    |
| PED alone                      | 3 (30.0)           | 6 (30.0)           | 1.000   |
| Coil density (%)               | 4.39 ± 2.41        | 4.33 ± 2.12        | .856    |
| Initial angiographic result    |                    |                    | .804    |
| OG1                            | 1 (10.0)           | 1 (5.0)            |         |
| OG2                            | 2 (20.0)           | 3 (15.0)           |         |
| OG3                            | 7 (70.0)           | 16 (80.0)          |         |

<sup>a</sup> Continuous variables are expressed as mean ± SD. Categorical variables are expressed as (No.) (%).

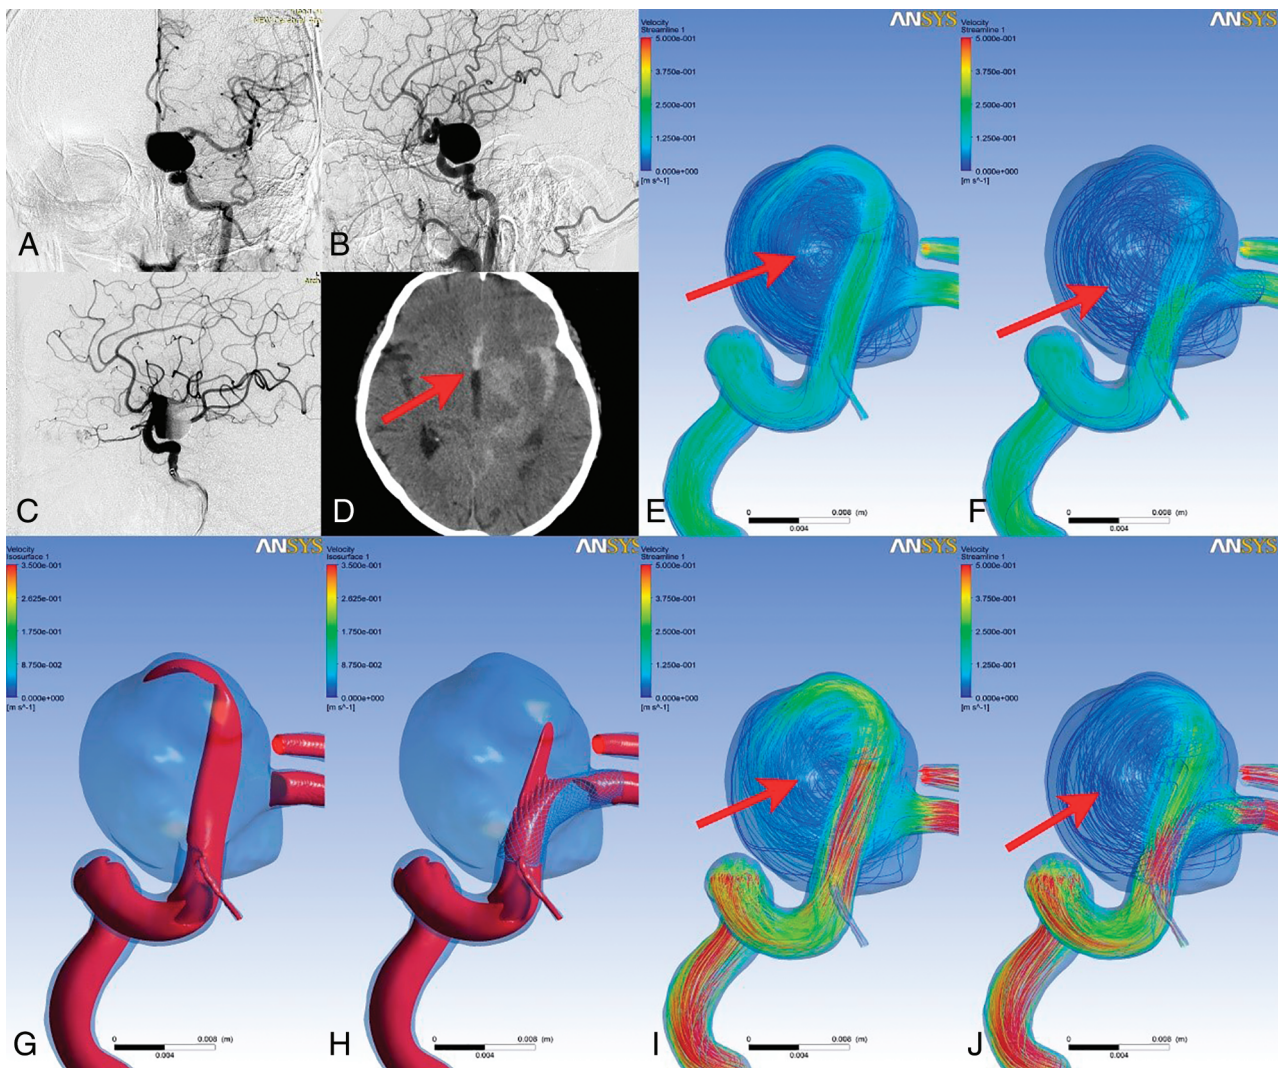

**ON-LINE FIG 1.** A female patient with a left internal carotid aneurysm was treated by a PED alone. Compared with the anteroposterior and lateral position of preoperative angiography (A and B), contrast agent retention is found (C). Unfortunately, the aneurysm ruptured 1 day postoperatively (D, arrow). After CFD analysis, we found that an unstable flow pattern appeared after treatment. Compared with the streamlines at end diastole, the vortex structure in the preoperative streamlines (E, arrow) is not changed at peak systole (I, arrow). However, after treatment, the vortex structure is moved at peak systole (F and J, arrows). Isovelocity surfaces show that the velocity in the aneurysm lumen decreased between the preoperative (G) and postoperative (H) periods.



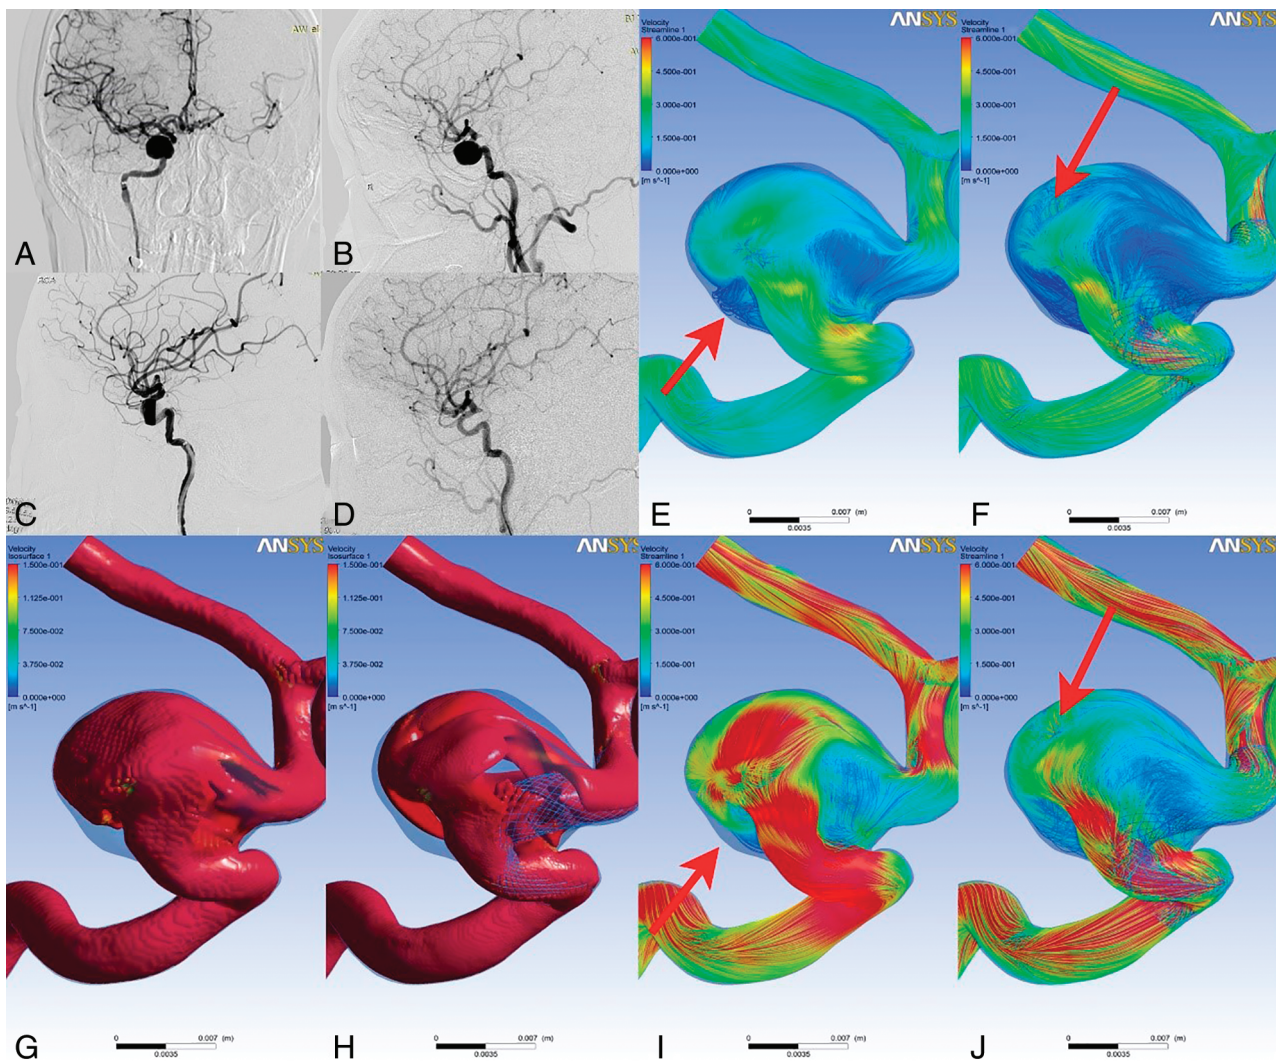

**ON-LINE FIG 2.** A female patient with a right internal carotid aneurysm was treated with a PED alone. Compared with anteroposterior and lateral position of preoperative angiography (A and B), contrast agent retention is found (C). At follow-up, the aneurysm is successfully embolized (D). After CFD analysis, we found that the unstable flow pattern disappeared after treatment. Compared with the streamlines at end diastole, the vortex structures in the preoperative streamlines (E, arrow) are found and disappear at peak systole (I, arrow). However, after treatment, the amount of vortex structure is not changed at peak systole (F and J, arrows). IsovLOCITY surfaces show that the velocity in the aneurysm lumen decreased between preoperative (G) and postoperative (H) periods.
